# Supplementary material
Source: publisher figshare collection journal article supplement (https://acs.figshare.com/ndownloader/files/4370929)
Supplement: Supplementary file 1 [file 4370929]

data_
_chemical_name_mineral [Fe(Htrz)2(trz)]BF4 - HS - with H
_cell_length_a  9.6439(21)
_cell_length_b  17.3437(39)
_cell_length_c  7.7818(15)
_cell_angle_alpha 90
_cell_angle_beta  90
_cell_angle_gamma 90
_cell_volume 1301.60(48)
_symmetry_space_group_name_H-M Cmcm
loop_
_symmetry_equiv_pos_as_xyz
	'-x, -y, -z'
	'-x, -y, z+1/2'
	'-x, y, -z+1/2'
	'-x, y, z'
	'-x+1/2, -y+1/2, -z'
	'-x+1/2, -y+1/2, z+1/2'
	'-x+1/2, y+1/2, -z+1/2'
	'-x+1/2, y+1/2, z'
	'x, -y, -z'
	'x, -y, z+1/2'
	'x, y, -z+1/2'
	'x, y, z'
	'x+1/2, -y+1/2, -z'
	'x+1/2, -y+1/2, z+1/2'
	'x+1/2, y+1/2, -z+1/2'
	'x+1/2, y+1/2, z'
loop_
_atom_site_label
_atom_site_type_symbol
_atom_site_symmetry_multiplicity
_atom_site_fract_x
_atom_site_fract_y
_atom_site_fract_z
_atom_site_occupancy
_atom_site_B_iso_or_equiv
Fe1 Fe   4 0 0.5 0 1 3
N2 N  16 0.14788(11) 0.545841(62) 0.15757(46) 1 3
N3 N   8 0 0.40183953(38) 0.14441556(48) 1 3
N4 N   8 0.33437(11) 0.609745(44) 0.25 1 3
H6 H   8 0.41721(13) 0.640045(45) 0.25 1 3
C8 C   8 0 0.3356918(17) 0.09265334(69) 1 3
N5 N   4 0 0.27473313(30) 0.25 1 3
H11 H   4 0 0.21712(14) 0.25 1 3
C7 C  16 0.267612(62) 0.593393(24) 0.10923(26) 1 3
H9 H  16 0.274152(94) 0.604208(38) -0.02613(48) 1 3
H10 H   8 0 0.32622(19) -0.04677(32) 1 3
B111 B   4 0 0.82587(48) 0.25 1 3
F12 F   8 0 0.87222(46) 0.39578(93) 1 3
F13 F   8 0.11869(74) 0.77995(47) 0.25 1 3
